# Supplementary material for: Photoelectrochemical Performance of Nanotubular Fe2O3–TiO2 Electrodes under Solar Radiation
Source: MDPI journal article supplement (doi:10.3390/nano12091546), 2022-05-03
Supplement: s1 [file s1]

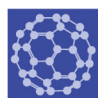

## Article

# Photoelectrochemical Performance of Nanotubular Fe<sub>2</sub>O<sub>3</sub>–TiO<sub>2</sub> Electrodes under Solar Radiation

Monika Sołtys-Mróz \*, Karolina Syrek \*, Łukasz Pięta, Kamilla Malek and Grzegorz D. Sulka

Faculty of Chemistry, Jagiellonian University, Gronostajowa 2, 30-387 Krakow, Poland; lukasz.pieta@doctoral.uj.edu.pl (Ł.P.); kamilla.malek@uj.edu.pl (K.M.); sulka@chemia.uj.edu.pl (G.D.S.)

\* Correspondence: soltys@chemia.uj.edu.pl (M.S.-M.); syrek@chemia.uj.edu.pl (K.S.);  
Tel.: +48-12-686-25-73 (M.S.-M.)

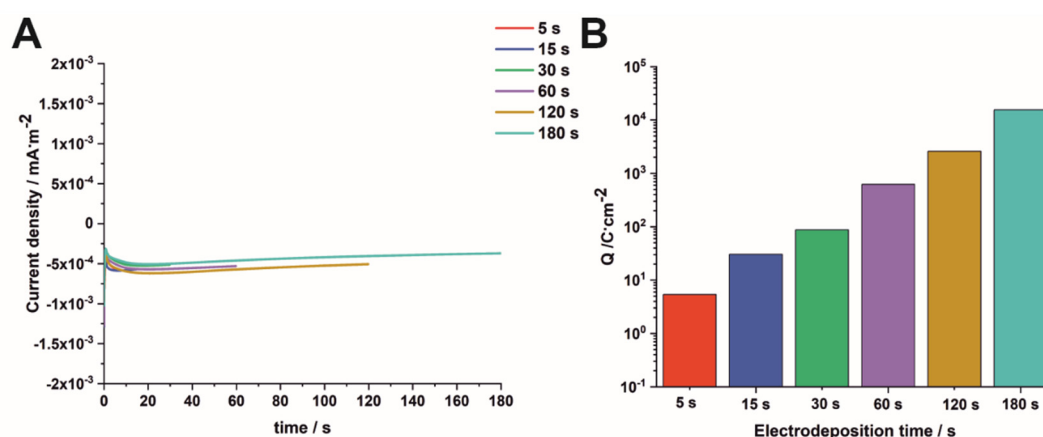

**Figure S1.** Current density-time curves recorded during Fe deposition at  $-1.3$  V vs. SCE for different durations (5–180 s) (A). The corresponding total charge densities obtained from current-time transients (B).

## Raman Spectroscopy

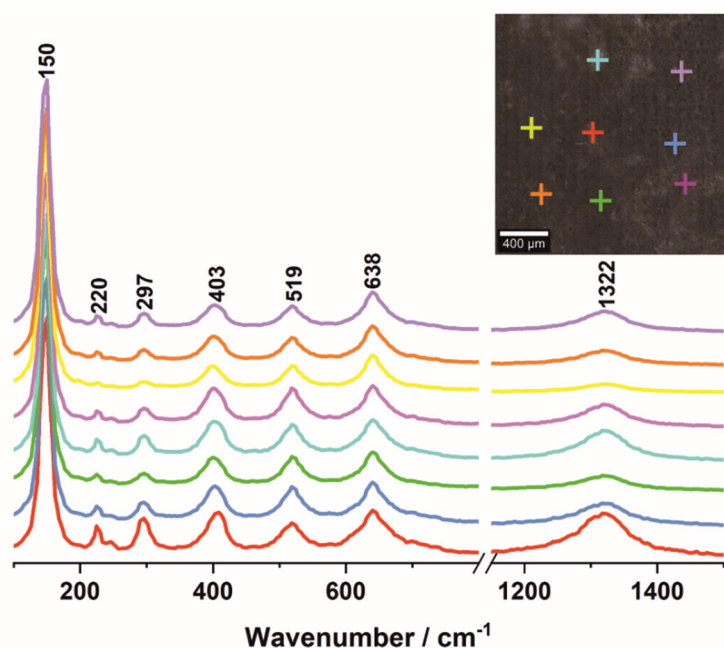

**Figure S2.** Raman spectra of the Fe<sub>2</sub>O<sub>3</sub>-TiO<sub>2</sub> sample electrodeposited for 60 s. The colors of different areas at the image correspond to the colors of the Raman spectra.

### Semiconducting Properties

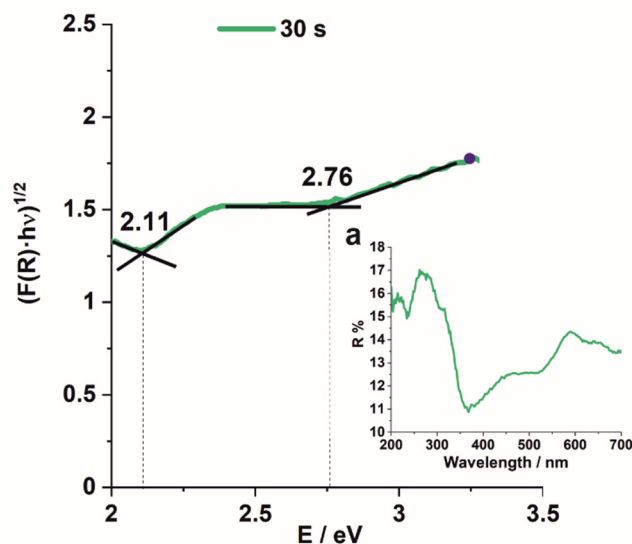

**Figure S3.** Example of determination of the band gap energy from UV-Vis measurements together with a diffuse reflectance plot (a).

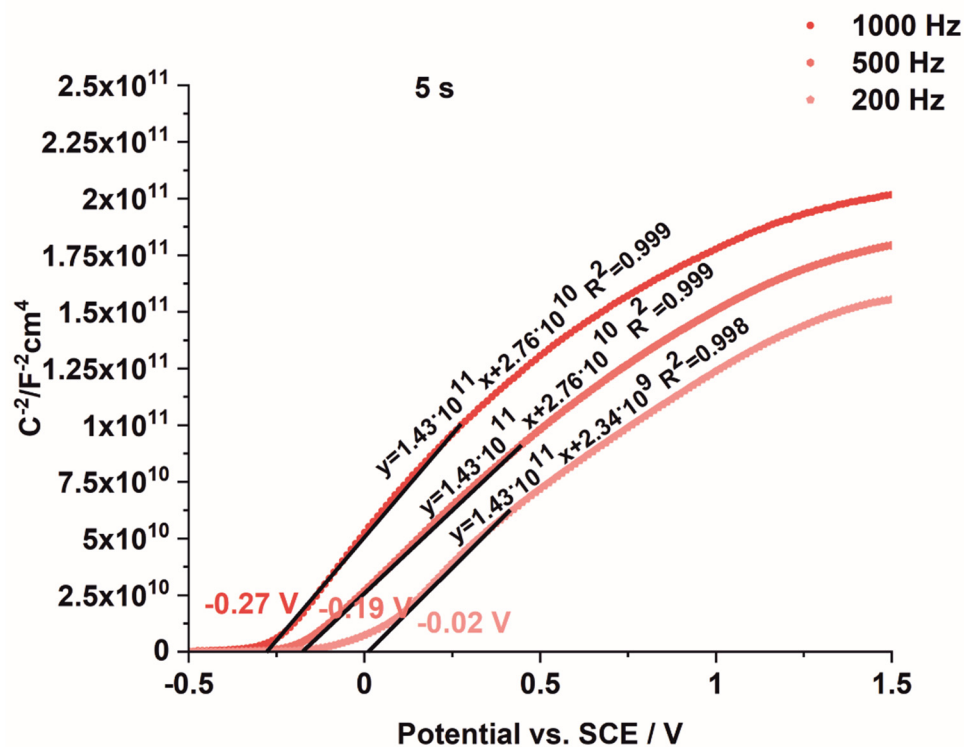

**Figure S4.** Mott-Schottky plots measured at different frequencies (1000, 500, and 200 Hz) for the sample electrodeposited for 5 s.

The donor density ( $N_d$ ) for nanotubular  $\text{TiO}_2$  and hybrid  $\text{Fe}_2\text{O}_3\text{-TiO}_2$  materials was determined as follows (S1):

$$N_d = \frac{2}{\epsilon_0 \epsilon_s A^2 e \text{ slope}} \quad (\text{S1})$$

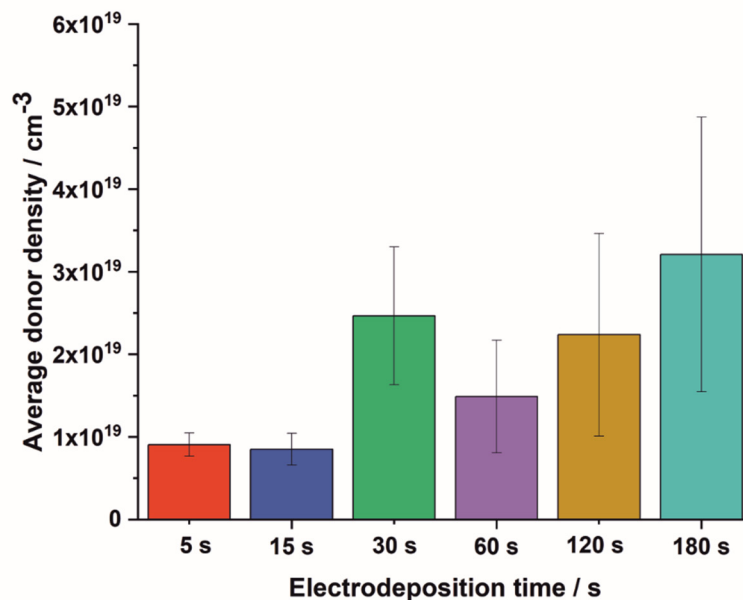

**Figure S5.** Average donor densities estimated for all studied materials, and for all tested frequencies.

#### Photoelectrochemical Measurements

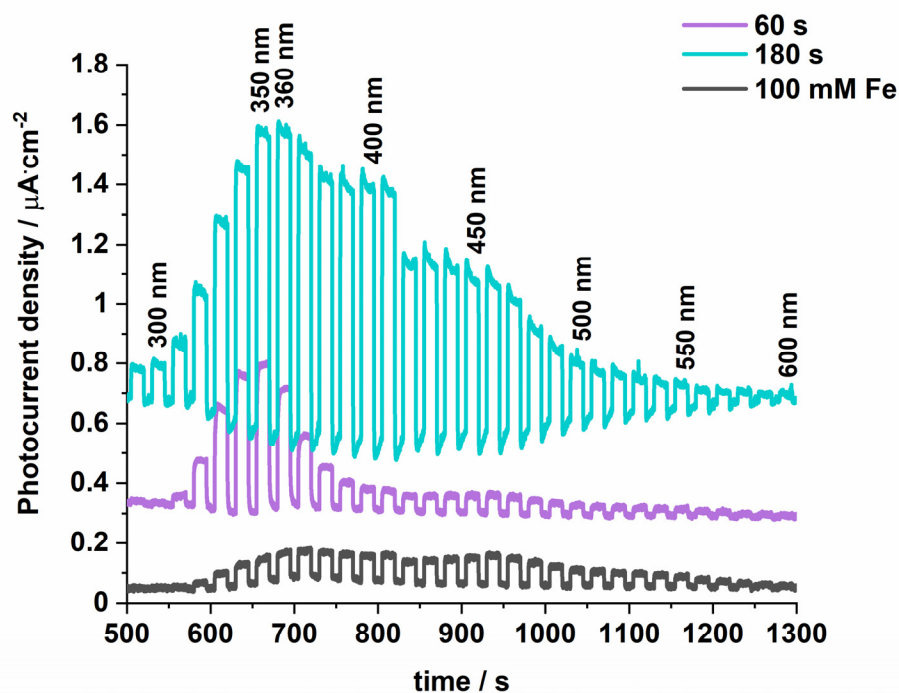

**Figure S6.** Photocurrent density vs. time curves recorded at 1 V vs. SCE for Fe<sub>2</sub>O<sub>3</sub>-TiO<sub>2</sub> samples obtained by electrodeposition for 60 s and 180 s as well as by impregnation method.

The Incident Photon to Current Efficiency (IPCE) was calculated based on the following formula (S2) [27]:

$$\text{IPCE} = 1240 \frac{I_p(\lambda)}{P(\lambda)\lambda} \quad (\text{S2})$$

where: 1240 is a constant (W nm A<sup>-1</sup>),  $I_p$  is the photocurrent density (A m<sup>-2</sup>) at the wavelength  $\lambda$  (nm), and  $P$  is the incident power density of light (W m<sup>-2</sup>) at  $\lambda$ .

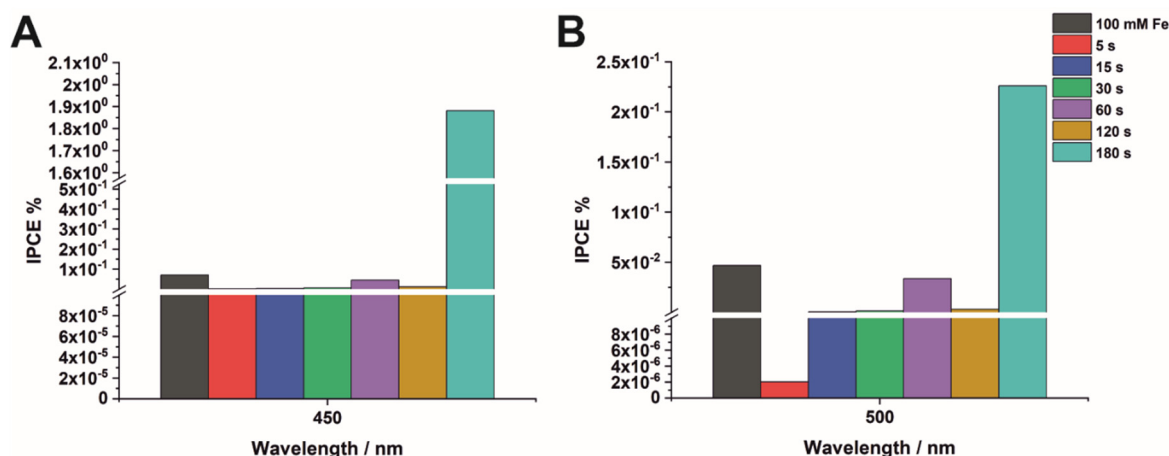

**Figure S7.** IPCE values obtained under monochromatic radiation for all modified samples at 450 nm (A) and 500 nm (B).

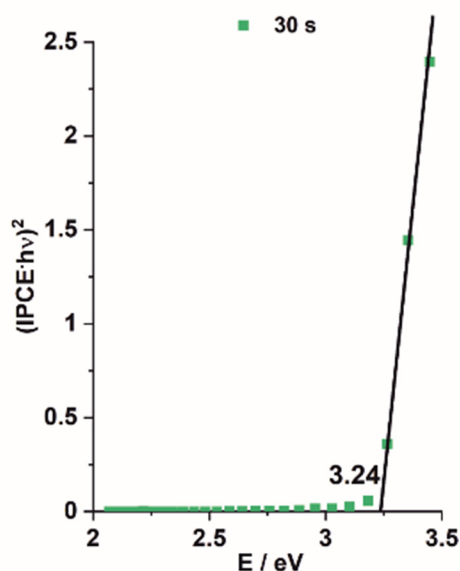

**Figure S8.** Example of determining the energy band gap from photoelectrochemical measurements for the Fe<sub>2</sub>O<sub>3</sub>-TiO<sub>2</sub> sample obtained by electrodeposition for 30 s.

**Table S1.** The comparison of PEC properties of Fe<sub>2</sub>O<sub>3</sub>-TiO<sub>2</sub> materials measured in 0.1 M KNO<sub>3</sub> at 1 V vs. SCE.

| Samples (Electrodeposition Time or Impregnation Solution Concentration) | Photocurrent Density under Monochromatic Radiation [ $\mu\text{A}\cdot\text{cm}^{-2}$ ] | IPCE %               |                      |                      | Photocurrent Density under Solar Radiation [ $\mu\text{A}\cdot\text{cm}^{-2}$ ] | Band Gap Energy [eV] |
|-------------------------------------------------------------------------|-----------------------------------------------------------------------------------------|----------------------|----------------------|----------------------|---------------------------------------------------------------------------------|----------------------|
|                                                                         |                                                                                         | 400 nm               | 450 nm               | 500 nm               |                                                                                 |                      |
| 5 s                                                                     | $3.9 \times 10^0$<br>/350 nm                                                            | $2.5 \times 10^{-1}$ | $1.2 \times 10^{-3}$ | $2.0 \times 10^{-6}$ | $9.9 \times 10^1$                                                               | $3.22 \pm 0.01$      |
| 15 s                                                                    | $1.3 \times 10^0$<br>/350 nm                                                            | $5.9 \times 10^{-2}$ | $2.9 \times 10^{-3}$ | $4.1 \times 10^{-4}$ | $6.8 \times 10^1$                                                               | $3.23 \pm 0.01$      |
| 30 s                                                                    | $6.0 \times 10^{-1}$<br>/360 nm                                                         | $5.4 \times 10^{-2}$ | $5.9 \times 10^{-3}$ | $1.3 \times 10^{-3}$ | $5.0 \times 10^1$                                                               | $3.17 \pm 0.01$      |
| 60 s                                                                    | $4.8 \times 10^{-1}$<br>/350 nm                                                         | $7.1 \times 10^{-2}$ | $4.5 \times 10^{-2}$ | $3.4 \times 10^{-2}$ | $1.3 \times 10^1$                                                               | $3.12 \pm 0.01$      |
| 120 s                                                                   | $2.0 \times 10^{-1}$<br>/350 nm                                                         | $4.5 \times 10^{-2}$ | $1.2 \times 10^{-2}$ | $3.1 \times 10^{-3}$ | $1.2 \times 10^1$                                                               | $3.16 \pm 0.01$      |
| 180 s                                                                   | $1.0 \times 10^0$<br>/360 nm                                                            | $1.1 \times 10^1$    | $1.9 \times 10^0$    | $2.3 \times 10^{-1}$ | $1.5 \times 10^1$                                                               | $2.80 \pm 0.01$      |
| 100 mM                                                                  | $8.8 \times 10^{-2}$<br>/360 nm                                                         | $9.0 \times 10^{-2}$ | $7.1 \times 10^{-2}$ | $4.7 \times 10^{-2}$ | $1.7 \times 10^1$                                                               | $2.73 \pm 0.01$      |

### Non-Enzymatic Glucose Sensing

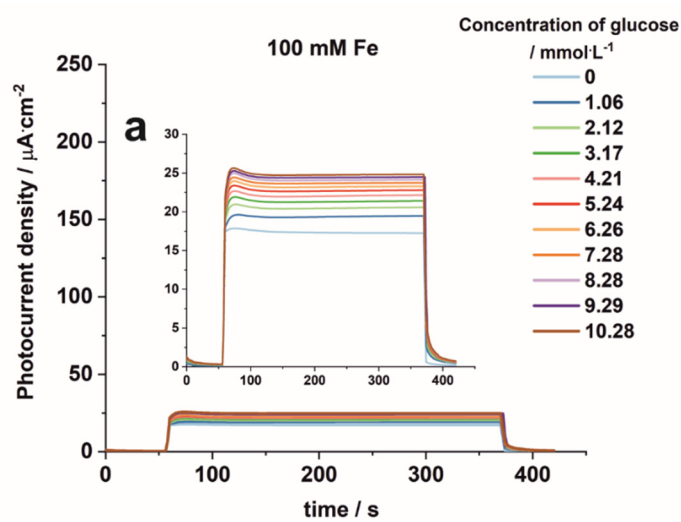**Figure S9.** Photocurrent density vs. time curves measured at 1 V vs. SCE in 0.1 M KNO<sub>3</sub> containing 1.06–10.28 mM of glucose under solar irradiation of the Fe<sub>2</sub>O<sub>3</sub>-TiO<sub>2</sub> sample impregnated in 100 mM FeCl<sub>3</sub> with inset.

**Table S2.** Calculated LOD, and LOQ values for all studied Fe<sub>2</sub>O<sub>3</sub>-TiO<sub>2</sub> electrodes.

| Samples (Electrodeposition Time or Im-<br>pregnation Solution Concentration) | LOD [mML <sup>-1</sup> ] |                  | LOQ [mML <sup>-1</sup> ] |                  |
|------------------------------------------------------------------------------|--------------------------|------------------|--------------------------|------------------|
|                                                                              | I Concentration          | II Concentration | II Concentration         | II Concentration |
|                                                                              | Range                    | Range            | Range                    | Range            |
| 5 s                                                                          | 14.806                   | 8.686            | 49.354                   | 28.954           |
| 15 s                                                                         | 14.075                   | 5.227            | 46.915                   | 17.424           |
| 30 s                                                                         | 24.175                   | 8.860            | 80.583                   | 29.533           |
| 60 s                                                                         |                          | 7.444            |                          | 24.813           |
| 120 s                                                                        |                          | 9.669            |                          | 32.230           |
| 180 s                                                                        |                          | 4.058            |                          | 13.526           |
| 100 mM Fe                                                                    |                          | 5.053            |                          | 16.843           |

**Table S3.** Glucose-sensing characteristics of the proposed sensor compared with data in the literature.

| Material                                                   | Sensitivity<br>[ $\mu\text{AmM}^{-1}\text{cm}^{-2}$ ] | Linear Range [mM] | Detection Limit<br>[ $\mu\text{M}$ ] | Response Time<br>[s] | Reference |
|------------------------------------------------------------|-------------------------------------------------------|-------------------|--------------------------------------|----------------------|-----------|
| Fe <sub>2</sub> O <sub>3</sub> nanowires                   | 726.9                                                 | 0.015–8           | 6                                    | < 6                  | [53]      |
| Fe <sub>2</sub> O <sub>3</sub> cubes/ITO                   | 32.3                                                  | 0.2–2             | 0.015                                | -                    | [54]      |
| Fe <sub>2</sub> O <sub>3</sub> -graphene                   | -                                                     | 0.0005–0.01       | 0.5                                  | -                    | [55]      |
| Fe <sub>2</sub> O <sub>3</sub> films/FTO                   | 17.23                                                 | 0.05–6            | 0.05                                 | < 5                  | [52]      |
| Fe <sub>2</sub> O <sub>3</sub> NR/FTO                      | 100.46                                                | 0.2–2.0           | 5.5                                  | -                    | [56]      |
| Fe <sub>2</sub> O <sub>3</sub> -TiO <sub>2</sub> nanotubes | 29.88                                                 | 1.06–2.12         | 14810                                | -                    | This work |
|                                                            |                                                       | 3.17–10.28        | 8690                                 |                      |           |
